# Supplementary material for: Optimized nitrogen rate, plant density, and irrigation level reduced ammonia emission and nitrate leaching on maize farmland in the oasis area of China
Source: PeerJ. 2022 Jan 19;10:e12762. doi: 10.7717/peerj.12762 (PMC8783566; doi:10.7717/peerj.12762)
Supplement: Supplemental Information 1 [file peerj-10-12762-s001.xlsx]

## Sheet: Sheet1
		2018 NH3	Emissions
	Treatment	30 days	60 days	90 days	120 days	150 days
	W1N0D1	0.059	0.003	0.029	0.03	0.14
		0.028	0.004	0.033	0.1	0.072
		0.007	0.003	0.036	0.046	0.057
	W1N0D2	0.018	0.001	0.021	0.021	0.068
		0.053	0.003	0.031	0.024	0.058
		0.021	0.002	0.027	0.042	0.077
	W1N0D3	0.054	0.002	0.055	0.053	0.05
		0.025	0.001	0.024	0.029	0.026
		0.021	0.001	0.048	0.043	0.022
	W1N1D1	0.03	0.013	0.023	0.04	0.061
		0.014	0.003	0.031	0.042	0.038
		0.031	0.014	0.057	0.042	0.061
	W1N1D2	0.026	0.01	0.05	0.034	0.058
		0.03	0.018	0.029	0.034	0.055
		0.044	0.024	0.023	0.041	0.062
	W1N1D3	0.021	0.009	0.025	0.035	0.084
		0.031	0.004	0.017	0.046	0.059
		0.045	0.008	0.034	0.046	0.063
	W1N2D1	0.028	0.013	0.017	0.029	0.079
		0.021	0.014	0.03	0.02	0.077
		0.036	0.016	0.021	0.027	0.074
	W1N2D2	0.04	0.007	0.017	0.016	0.051
		0.017	0.004	0.03	0.038	0.068
		0.015	0.003	0.022	0.028	0.079
	W1N2D3	0.033	0.005	0.036	0.009	0.085
		0.016	0.008	0.029	0.035	0.071
		0.028	0.002	0.028	0.014	0.075
	W2N0D1	0.007	0.011	0.018	0.035	0.044
		0.023	0.003	0.022	0.017	0.072
		0.018	0.023	0.048	0.04	0.08
	W2N0D2	0.031	0.016	0.004	0.027	0.022
		0.054	0.011	0.032	0.038	0.038
		0.043	0.011	0.019	0.017	0.073
	W2N0D3	0.024	0.022	0.028	0.041	0.065
		0.035	0.017	0.038	0.033	0.07
		0.017	0.012	0.032	0.031	0.11
	W2N1D1	0.022	0.009	0.031	0.046	0.065
		0.056	0.015	0.044	0.019	0.095
		0.021	0.013	0.022	0.045	0.083
	W2N1D2	0.048	0.024	0.024	0.055	0.047
		0.023	0.011	0.024	0.024	0.061
		0.021	0.013	0.026	0.029	0.072
	W2N1D3	0.058	0.009	0.013	0.014	0.069
		0.028	0.016	0.019	0.018	0.062
		0.054	0.016	0.038	0.029	0.06
	W2N2D1	0.064	0.019	0.016	0.05	0.083
		0.041	0.002	0.42	0.037	0.068
		0.022	0.015	0.021	0.041	0.066
	W2N2D2	0.056	0.011	0.035	0.032	0.055
		0.026	0.026	0.039	0.049	0.094
		0.04	0.002	0.033	0.066	0.1
	W2N2D3	0.032	0.023	0.07	0.058	0.063
		0.007	0.015	0.009	0.045	0.088
		0.009	0.015	0.002	0.047	0.088
