# Supplementary material for: Optimized nitrogen rate, plant density, and irrigation level reduced ammonia emission and nitrate leaching on maize farmland in the oasis area of China
Source: PeerJ. 2022 Jan 19;10:e12762. doi: 10.7717/peerj.12762 (PMC8783566; doi:10.7717/peerj.12762)
Supplement: Supplemental Information 5 — Raw data of air temperature and precipiation of 2018 and 2019 [file peerj-10-12762-s005.xlsx]

## Sheet: Sheet1
2018													2019
Date	降雨量 Precipiation(mm)	气温 Temperature(℃)											Date	Precipiation	Temperature
2018-03-01	0	5.1											2019-03-01	0	1
2018-03-02	0	5.6											2019-03-02	0	1.2
2018-03-03	0	3.7											2019-03-03	0	1.6
2018-03-04	0	2.2											2019-03-04	0	2.1
2018-03-05	0	2.9											2019-03-05	0	1.5
2018-03-06	0	4.3											2019-03-06	0	1.4
2018-03-07	0	2.5											2019-03-07	0	2.1
2018-03-08	0	1.3											2019-03-08	0	4.2
2018-03-09	0	3.3											2019-03-09	0	2.8
2018-03-10	0	3.6											2019-03-10	0	1.2
2018-03-11	0	7.4											2019-03-11	0	1.2
2018-03-12	0	7.6											2019-03-12	0	0.9
2018-03-13	0	9.2											2019-03-13	0	1.5
2018-03-14	0	8.4											2019-03-14	0	3.6
2018-03-15	0	5.6											2019-03-15	0	2.9
2018-03-16	0	3											2019-03-16	0	3.8
2018-03-17	0	5.4											2019-03-17	0	4.2
2018-03-18	0	4.2											2019-03-18	0	6.9
2018-03-19	0.3	4.8											2019-03-19	0	9.7
2018-03-20	0.7	4.4											2019-03-20	0	1.4
2018-03-21	0	7.5											2019-03-21	0	0.1
2018-03-22	0	7.9											2019-03-22	0	2.9
2018-03-23	0	9.1											2019-03-23	0	2.1
2018-03-24	0	9.1											2019-03-24	0	4.3
2018-03-25	0	12.2											2019-03-25	0	5
2018-03-26	0	14.6											2019-03-26	0	7.3
2018-03-27	0	12.7											2019-03-27	0	8.1
2018-03-28	0	13.1											2019-03-28	0	7.1
2018-03-29	0	11.5											2019-03-29	0	5.1
2018-03-30	0	13											2019-03-30	0	1.7
2018-03-31	0	13											2019-03-31	0	4.9
2018-04-01	0	12.9											2019-04-01	0	5.5
2018-04-02	0	13											2019-04-02	0	9.8
2018-04-03	0	10.7											2019-04-03	0	10.1
2018-04-04	0	6											2019-04-04	0	9.9
2018-04-05	0	1.9											2019-04-05	0	12.7
2018-04-06	0	-1.5											2019-04-06	0	14.8
2018-04-07	0	3.9											2019-04-07	0	13.5
2018-04-08	0	10											2019-04-08	2.1	6.5
2018-04-09	0	10											2019-04-09	0	6.7
2018-04-10	0	11.3											2019-04-10	0	6.9
2018-04-11	0	9.8											2019-04-11	0	8.1
2018-04-12	1	7.6											2019-04-12	0.3	12.8
2018-04-13	0.1	5.5											2019-04-13	1.8	10.5
2018-04-14	0	6.2											2019-04-14	0	12.2
2018-04-15	0	9											2019-04-15	0	13.3
2018-04-16	0	11.9											2019-04-16	0	15.8
2018-04-17	0	16.8											2019-04-17	0	19.8
2018-04-18	0	17.8											2019-04-18	0	16.8
2018-04-19	0	17.9											2019-04-19	0	15.5
2018-04-20	0	17											2019-04-20	0	15.8
2018-04-21	0	12.5											2019-04-21	0	16.9
2018-04-22	0	12.8											2019-04-22	0	18.8
2018-04-23	18.9	6.5											2019-04-23	0	20.5
2018-04-24	1.1	9.5											2019-04-24	0	18
2018-04-25	0	13											2019-04-25	0	18.7
2018-04-26	0	14.1											2019-04-26	0	16.2
2018-04-27	0	16.4											2019-04-27	0.2	14.4
2018-04-28	0	16.8											2019-04-28	0	14.3
2018-04-29	0	16.1											2019-04-29	3.1	9.7
2018-04-30	0	15.7											2019-04-30	0	10.3
2018-05-01	0	14.1											2019-05-01	0	14.8
2018-05-02	0	13.1											2019-05-02	0	16.9
2018-05-03	0	18.6											2019-05-03	10.9	14.1
2018-05-04	0	17.1											2019-05-04	0	16.8
2018-05-05	0	13.5											2019-05-05	1.5	11.7
2018-05-06	0	15.3											2019-05-06	5.5	9.2
2018-05-07	0	15.3											2019-05-07	5.4	8.7
2018-05-08	0	16.5											2019-05-08	1.2	9.4
2018-05-09	0	13.4											2019-05-09	0.8	10.3
2018-05-10	0.9	12.5											2019-05-10	0	11.9
2018-05-11	0	15.7											2019-05-11	0	14.6
2018-05-12	0	18.6											2019-05-12	0	8.3
2018-05-13	0	24.7											2019-05-13	0	14.6
2018-05-14	0	25.8											2019-05-14	0	17.5
2018-05-15	0	23											2019-05-15	0	18.2
2018-05-16	0	17.4											2019-05-16	0	19.6
2018-05-17	0	19.8											2019-05-17	0	20
2018-05-18	0	19.3											2019-05-18	0	13.6
2018-05-19	2.6	16.3											2019-05-19	0	11.1
2018-05-20	0	15.6											2019-05-20	0	14.2
2018-05-21	0	10.1											2019-05-21	0	17.1
2018-05-22	0	14.6											2019-05-22	0	19.3
2018-05-23	0	17.9											2019-05-23	0	21
2018-05-24	0	21.9											2019-05-24	0	22.2
2018-05-25	0.7	14.4											2019-05-25	0	18.3
2018-05-26	0.1	13.3											2019-05-26	0	14.8
2018-05-27	0	17.5											2019-05-27	0	14.8
2018-05-28	0	19.5											2019-05-28	0	14.9
2018-05-29	0	20.2											2019-05-29	0	16.3
2018-05-30	0	21.9											2019-05-30	0	18.7
2018-05-31	0	23.2											2019-05-31	1.1	18.1
2018-06-01	0	22.2											2019-06-01	0	19.8
2018-06-02	0	18.3											2019-06-02	0	22
2018-06-03	0	18.1											2019-06-03	0	22.5
2018-06-04	0	19.8											2019-06-04	0	21.1
2018-06-05	0	22.7											2019-06-05	0	21.3
2018-06-06	0	18.4											2019-06-06	0	22.7
2018-06-07	0	16.9											2019-06-07	0.6	18.5
2018-06-08	0	18.4											2019-06-08	0	20.8
2018-06-09	0	19											2019-06-09	0	21.9
2018-06-10	0	21.5											2019-06-10	0	22.6
2018-06-11	0	22.9											2019-06-11	0.1	20.2
2018-06-12	0	22											2019-06-12	0	20.8
2018-06-13	0	24.1											2019-06-13	0	23.2
2018-06-14	0	23.2											2019-06-14	0.6	17.3
2018-06-15	0	25.8											2019-06-15	2.3	16.9
2018-06-16	0	23.2											2019-06-16	0	20.6
2018-06-17	0	21.4											2019-06-17	0	23
2018-06-18	0.8	22.2											2019-06-18	0	21.1
2018-06-19	0	22.8											2019-06-19	0.3	20.4
2018-06-20	0	22.8											2019-06-20	0.4	18.8
2018-06-21	0	25.6											2019-06-21	5.8	17.8
2018-06-22	0	24.1											2019-06-22	0.8	20
2018-06-23	0	24.3											2019-06-23	3.1	18.5
2018-06-24	0	20.4											2019-06-24	0	23.6
2018-06-25	0.3	19.9											2019-06-25	3.3	19.2
2018-06-26	0	19											2019-06-26	41.6	15.7
2018-06-27	0	24.7											2019-06-27	2.4	15.2
2018-06-28	1.5	26.7											2019-06-28	0	19.1
2018-06-29	0	23.2											2019-06-29	0	19.1
2018-06-30	5.6	23.5											2019-06-30	0	20.9
2018-07-01	0	19.5											2019-07-01	0	22
2018-07-02	0.1	19.6											2019-07-02	0	22.8
2018-07-03	0	19.4											2019-07-03	0	22.8
2018-07-04	0	22.2											2019-07-04	0	24.5
2018-07-05	0	23.8											2019-07-05	0	24.1
2018-07-06	0	20.6											2019-07-06	0	21.6
2018-07-07	0.1	18.6											2019-07-07	10.4	15.4
2018-07-08	0	19											2019-07-08	8.2	15.3
2018-07-09	0	24.1											2019-07-09	6	18.3
2018-07-10	0	20.4											2019-07-10	0	20.3
2018-07-11	0	21.5											2019-07-11	0	20.7
2018-07-12	0	25											2019-07-12	0	22.2
2018-07-13	0	26.8											2019-07-13	0	22.8
2018-07-14	0	23.7											2019-07-14	0	19.3
2018-07-15	0	21.9											2019-07-15	0	20.9
2018-07-16	0	25.9											2019-07-16	0	22.1
2018-07-17	0	28.3											2019-07-17	0	22.2
2018-07-18	11.2	23.5											2019-07-18	0	20
2018-07-19	0	25											2019-07-19	1	22.8
2018-07-20	8.3	19.3											2019-07-20	0	23.7
2018-07-21	0	21.6											2019-07-21	0.1	21.4
2018-07-22	0	23.2											2019-07-22	0	21.6
2018-07-23	7.8	21.2											2019-07-23	0	19.9
2018-07-24	0	23.3											2019-07-24	0	21.3
2018-07-25	0	25.3											2019-07-25	0	24.3
2018-07-26	0	25.8											2019-07-26	0.3	25.1
2018-07-27	0	27.6											2019-07-27	0.1	23.3
2018-07-28	0	24.7											2019-07-28	4.9	18.5
2018-07-29	0	22.4											2019-07-29	0	21.8
2018-07-30	0	26.7											2019-07-30	0	22.5
2018-07-31	0	26.2											2019-07-31	0	21.5
2018-08-01	53.7	26.1											2019-08-01	0	22.8
2018-08-02	0	20.2											2019-08-02	0.3	23.7
2018-08-03	0	21.1											2019-08-03	0	22.5
2018-08-04	0	24.7											2019-08-04	0	24.9
2018-08-05	0	24.3											2019-08-05	0.4	23.5
2018-08-06	8.9	21.3											2019-08-06	0	24.4
2018-08-07	10.2	21.6											2019-08-07	0	23.9
2018-08-08	0	23.1											2019-08-08	10.5	18.3
2018-08-09	11.5	22.4											2019-08-09	0	21.1
2018-08-10	0	22.7											2019-08-10	0	22.3
2018-08-11	0	23.5											2019-08-11	0	21.1
2018-08-12	0.1	21.6											2019-08-12	0	21.5
2018-08-13	0	23											2019-08-13	2	19.3
2018-08-14	0	22.1											2019-08-14	0	21.5
2018-08-15	0.3	20.7											2019-08-15	0	23
2018-08-16	0	17.1											2019-08-16	0	19.1
2018-08-17	0.2	17.9											2019-08-17	0	21.6
2018-08-18	0	19.3											2019-08-18	0	23
2018-08-19	0	22.7											2019-08-19	1.3	19
2018-08-20	0.4	19.7											2019-08-20	1.7	18.8
2018-08-21	36.4	17.2											2019-08-21	0	19.1
2018-08-22	0	17.7											2019-08-22	0	17.5
2018-08-23	0	19.8											2019-08-23	0	17.1
2018-08-24	0.4	19.4											2019-08-24	0	20.5
2018-08-25	13.7	19											2019-08-25	0	22.5
2018-08-26	0	19.5											2019-08-26	1.7	21.1
2018-08-27	0	19.9											2019-08-27	0	21.5
2018-08-28	0	20.5											2019-08-28	7.3	20.2
2018-08-29	0	19.4											2019-08-29	0	20.5
2018-08-30	9.2	17.6											2019-08-30	0	20
2018-08-31	16.5	17.1											2019-08-31	0	18.9
2018-09-01	2.7	17.7											2019-09-01	0	19.6
2018-09-02	0.1	17.1											2019-09-02	0	21.5
2018-09-03	0	18.3											2019-09-03	0	20.9
2018-09-04	0	15.6											2019-09-04	0	20.4
2018-09-05	0.2	15.5											2019-09-05	0	22.3
2018-09-06	0	13.4											2019-09-06	0	21.9
2018-09-07	0	12.2											2019-09-07	0	21.3
2018-09-08	0	14											2019-09-08	5.2	16.1
2018-09-09	0.9	15											2019-09-09	6.7	14.7
2018-09-10	0	15.2											2019-09-10	0	15
2018-09-11	0	17											2019-09-11	0	17.2
2018-09-12	0	18.5											2019-09-12	3.7	12.5
2018-09-13	0	19.3											2019-09-13	0	13.7
2018-09-14	4.2	10.4											2019-09-14	0	14.5
2018-09-15	1.7	9.6											2019-09-15	1.7	14.6
2018-09-16	0	11											2019-09-16	0	15.5
2018-09-17	0.5	11.7											2019-09-17	0.1	16.3
2018-09-18	0	13.6											2019-09-18	0.5	16.2
2018-09-19	0	15.9											2019-09-19	2	14.3
2018-09-20	0	14.2											2019-09-20	0	12.9
2018-09-21	0	10.6											2019-09-21	0	12.9
2018-09-22	0	10.6											2019-09-22	0	13.3
2018-09-23	0	10.9											2019-09-23	0	13.1
2018-09-24	0	12.1											2019-09-24	0	14.4
2018-09-25	0	16.9											2019-09-25	0	13.7
2018-09-26	0	16.3											2019-09-26	0	13.8
2018-09-27	2.8	12											2019-09-27	0	14.2
2018-09-28	0	9.3											2019-09-28	0	16.6
2018-09-29	0	9.8											2019-09-29	0	16.6
2018-09-30	0	9.4											2019-09-30	0	17.4
2018-10-01	0	10											2019-10-01	0	17.6
2018-10-02	0	9.1											2019-10-02	0	16.2
2018-10-03	0	8.8											2019-10-03	0	14.2
2018-10-04	0	12											2019-10-04	0.5	10.6
2018-10-05	0	8.8											2019-10-05	0	7.7
2018-10-06	0	7.2											2019-10-06	6.1	7.1
2018-10-07	0	5.8											2019-10-07	0	8.9
2018-10-08	0	6.4											2019-10-08	3.6	8.2
2018-10-09	0	3.7											2019-10-09	3.5	10.8
2018-10-10	0	4.4											2019-10-10	0	9.1
2018-10-11	0	3.7											2019-10-11	0	11.7
2018-10-12	0	5.4											2019-10-12	1	10.8
2018-10-13	0	5.7											2019-10-13	0	9.7
2018-10-14	0	7.4											2019-10-14	0	4.8
2018-10-15	0	5.8											2019-10-15	2.7	3.4
2018-10-16	0	6.1											2019-10-16	0	4.4
2018-10-17	0	6.3											2019-10-17	0.1	7.4
2018-10-18	0	7											2019-10-18	0	8.4
2018-10-19	4.9	7.2											2019-10-19	0	6
2018-10-20	0	5.5											2019-10-20	0	6.9
2018-10-21	0	5.8											2019-10-21	0	8.5
2018-10-22	0	4.7											2019-10-22	0	9.7
2018-10-23	0	4.8											2019-10-23	3.2	4.5
2018-10-24	0	5.9											2019-10-24	0	0.3
2018-10-25	0	3.4											2019-10-25	0	1.7
2018-10-26	0	1.4											2019-10-26	0	3
2018-10-27	0	3.8											2019-10-27	0	2.2
2018-10-28	0	3.3											2019-10-28	0	4
2018-10-29	0	4.8											2019-10-29	0	3.6
2018-10-30	0	3.9											2019-10-30	0	2.7
2018-10-31	0	4.8											2019-10-31	0.1	2.5
	241.6													192.1
